# Supplementary material for: Examining the Landscape of Prognostic Factors and Clinical Outcomes for Cancer Control
Source: Curr Oncol. 2021 Dec 6;28(6):5155–66. doi: 10.3390/curroncol28060432 (PMC8699872; doi:10.3390/curroncol28060432)
Supplement: Supplementary file 1 [file curroncol-28-00432-s001.zip › curroncol-1450320-supplementary.pdf]

## **SUPPLEMENTARY MATERIALS**

### **Introduction**

1. To begin, could you please provide us with some background about yourself:
  - a. What is your current role?
  - b. How long you have been involved with cancer control activities / prognostic factors work / health systems work?

### **Cancer Prognostic Factors**

2. What is your understanding of the current collection of prognostic factors in cancer?
3. What prognostic factors does your organization currently collect?
  - a. Without any financial or logistical limitations, what other prognostic factors should ideally be collected?
4. How do you define or decide what prognostic factors need to be collected for population-based cancer registries?
  - a. What is the process for making these decisions at your organization?
5. What do you perceive to be the biggest the barriers in the collection of prognostic factors?
  - a. Outside of financial constraints?

### **Cancer Outcomes**

6. What is your understanding of the current collection of outcomes data in cancer?
7. What clinical cancer outcomes does your organization currently collect?
  - a. Other than survival / death?
  - b. Without any financial or logistical limitations, what other clinical outcomes should ideally be collected?
8. How do you define or decide what outcomes should be collected for population-based cancer registries?
  - a. What is your process for making these decisions?
9. What are the barriers to collection of cancer outcomes?
  - a. Outside of financial constraints?

### **Applications/Future Outlook**

10. With respect to both prognostic factors and / or clinical outcomes, once this data is collected how is it being used?
  - a. How do you expect the application of this data to evolve in the future?
11. What is needed to move us forward in the collection of prognostic factors and outcomes?
